# Supplementary material for: Disproportionation and radical formation in the coordination of “GaI” with bis(imino)pyridines
Source: Royal Society of Chemistry journal article supplement (doi:10.1039/b920047a), 2009-11-25
Supplement: b920047a.pdf [file b920047a.pdf]

**Supplementary Information for:**

**Disproportionation and radical formation in the coordination of “Gal” with bis(imino)pyridines.**

Titel Jurca, Karl Dawson, Ian Mallov, Tara J. Burchell, Glenn P. A. Yap, and Darrin S. Richeson

*Centre for Catalysis Research and Innovation and Department of Chemistry, University of Ottawa, Ottawa, Ontario, K1N 6N5*

*Department of Chemistry & Biochemistry, University of Delaware  
Newark, DE 19716.*

EPR spectrum of compound **7** 1 page

Computational details 1 pages

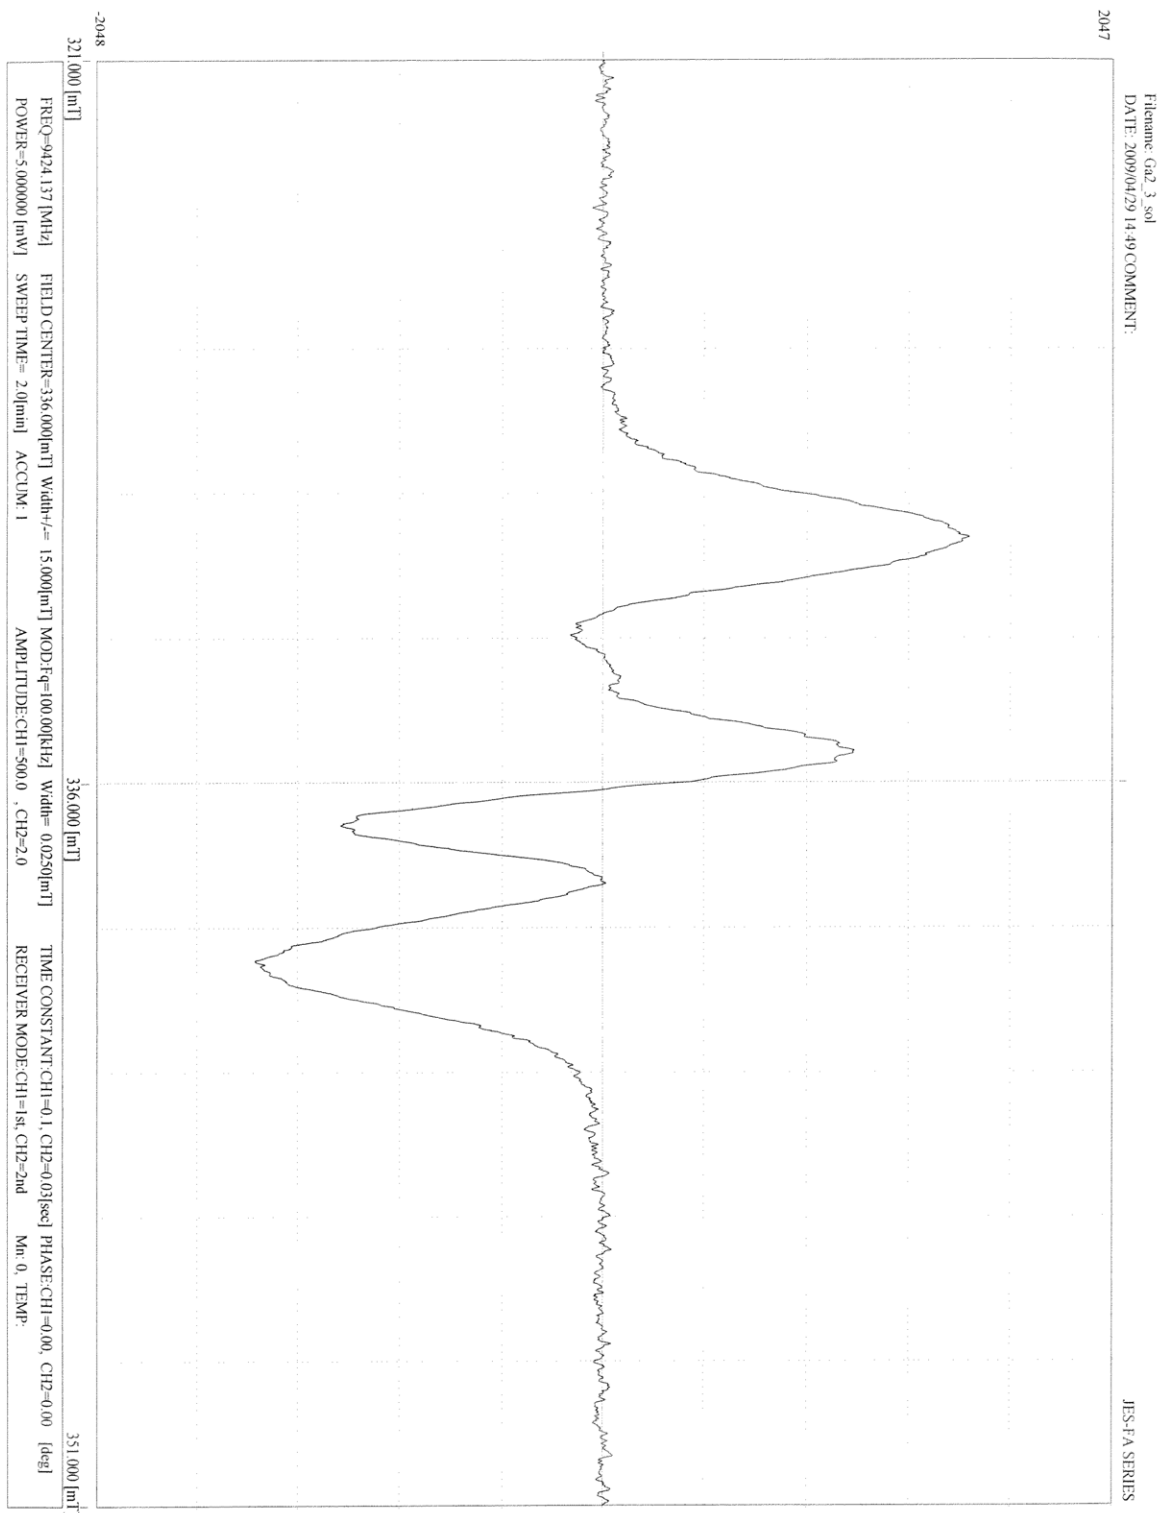

**Figure S1. EPR spectrum for compound 7.**

### Computational Details

Both the thermochemical analysis of the disproportionation reaction of 2,6- $\{\text{DippN}=\text{CPh}\}_2(\text{NC}_5\text{H}_3)\text{GaI}$  in the presence of GaI and the optimization of compound **6** were performed with DFT calculations and the B3LYP functional using the Gaussian 03 (revision D.01) suite of programs.<sup>1</sup> The basis set DGDZVP was employed.

The compounds and atom in equation 1 were optimized and the results presented in Table 1. The enthalpy of atomization for Ga of 276kJ/mol = 0.10518 au/atom was used to calculate the net reaction enthalpy. This data provides a net reaction enthalpy of -0.108552 au =  $-4.73259 \times 10^{-22}$  kJ or -28.5003 kJ/mole.

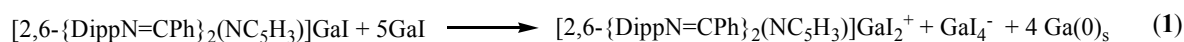

Table 1. Energies of the species in eq. 1 obtained by computation.

| Compound                                                                   | Energy (atomic units)   |
|----------------------------------------------------------------------------|-------------------------|
| 2,6- $\{\text{DippN}=\text{CPh}\}_2(\text{NC}_5\text{H}_3)\text{GaI}$      | -10675.7050987          |
| GaI                                                                        | -8844.4058746           |
| 2,6- $\{\text{DippN}=\text{CPh}\}_2(\text{NC}_5\text{H}_3)]\text{GaI}_2^+$ | -17595.430207           |
| $\text{GaI}_4^-$                                                           | -29604.2606012          |
| $\text{Ga}_s$                                                              | -1924.4328944 - 0.42060 |

<sup>1</sup> Gaussian 03, Revision D.01, M. J. Frisch, G. W. Trucks, H. B. Schlegel, G. E. Scuseria, M. A. Robb, J. R. Cheeseman, J. A. Montgomery, Jr., T. Vreven, K. N. Kudin, J. C. Burant, J. M. Millam, S. S. Iyengar, J. Tomasi, V. Barone, B. Mennucci, M. Cossi, G. Scalmani, N. Rega, G. A. Petersson, H. Nakatsuji, M. Hada, M. Ehara, K. Toyota, R. Fukuda, J. Hasegawa, M. Ishida, T. Nakajima, Y. Honda, O. Kitao, H. Nakai, M. Klene, X. Li, J. E. Knox, H. P. Hratchian, J. B. Cross, C. Adamo, J. Jaramillo, R. Gomperts, R. E. Stratmann, O. Yazyev, A. J. Austin, R. Cammi, C. Pomelli, J. W. Ochterski, P. Y. Ayala, K. Morokuma, G. A. Voth, P. Salvador, J. J. Dannenberg, V. G. Zakrzewski, S. Dapprich, A. D. Daniels, M. C. Strain, O. Farkas, D. K. Malick, A. D. Rabuck, K. Raghavachari, J. B. Foresman, J. V. Ortiz, Q. Cui, A. G. Baboul, S. Clifford, J. Cioslowski, B. B. Stefanov, G. Liu, A. Liashenko, P. Piskorz, I. Komaromi, R. L. Martin, D. J. Fox, T. Keith, M. A. Al-Laham, C. Y. Peng, A. Nanayakkara, M. Challacombe, P. M. W. Gill, B. Johnson, W. Chen, M. W. Wong, C. Gonzalez, and J. A. Pople, Gaussian, Inc., Wallingford CT, 2004.
